# Supplementary material for: Natural phenolic compound–iron complexes: sustainable solar absorbers for wood-based solar steam generation devices
Source: Royal Society of Chemistry journal article supplement (doi:10.1039/c9ra08235b), 2020-01-01
Supplement: c9ra08235b1.pdf [file c9ra08235b1.pdf]

## Supporting information

### Natural phenolic compound-iron complexes: sustainable solar absorbers for wood-based solar steam generation devices

He Gao<sup>+</sup>, Mingming Yang<sup>+</sup>, Ben Dang, Xiongfei Luo, Shouxin Liu, Shujun Li, Zhijun

Chen,<sup>\*</sup> and Jian Li<sup>\*</sup>

Key Laboratory of Bio-based Material Science and Technology of Ministry of Education, Northeast Forestry University, Hexing Road 26, Harbin 150040, P.R. China

Email: chenzhijun@nefu.edu.cn; nefulijian@163.com

<sup>+</sup> These authors contributed equally to the work.

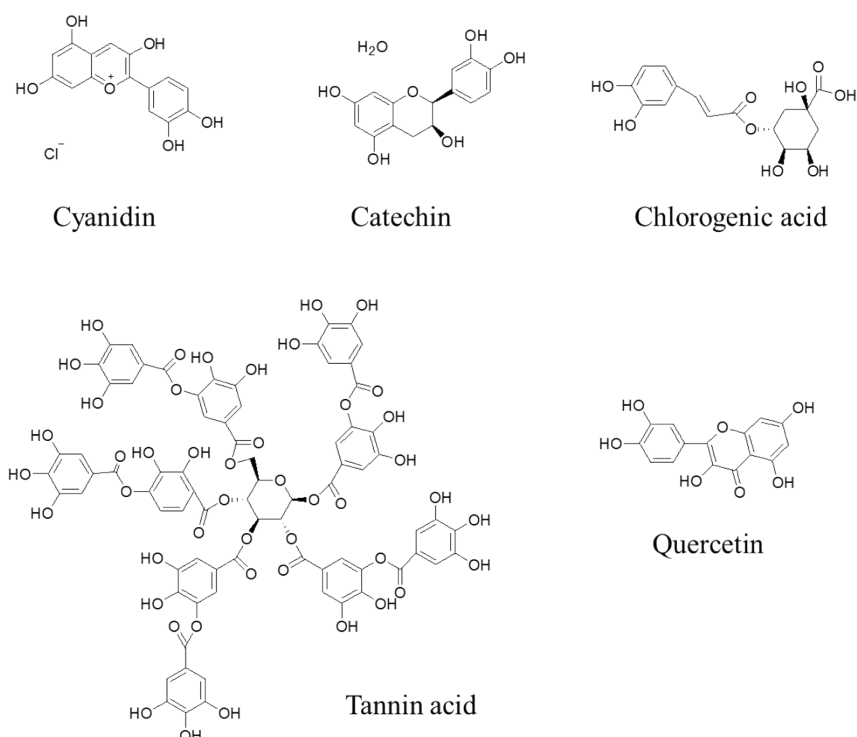

**Figure S1.** Chemical structures of natural phenolic compounds. catechin (1), quercetin (2), cyanidin (3), chlorogenic acid (4) and tannin acid (5)

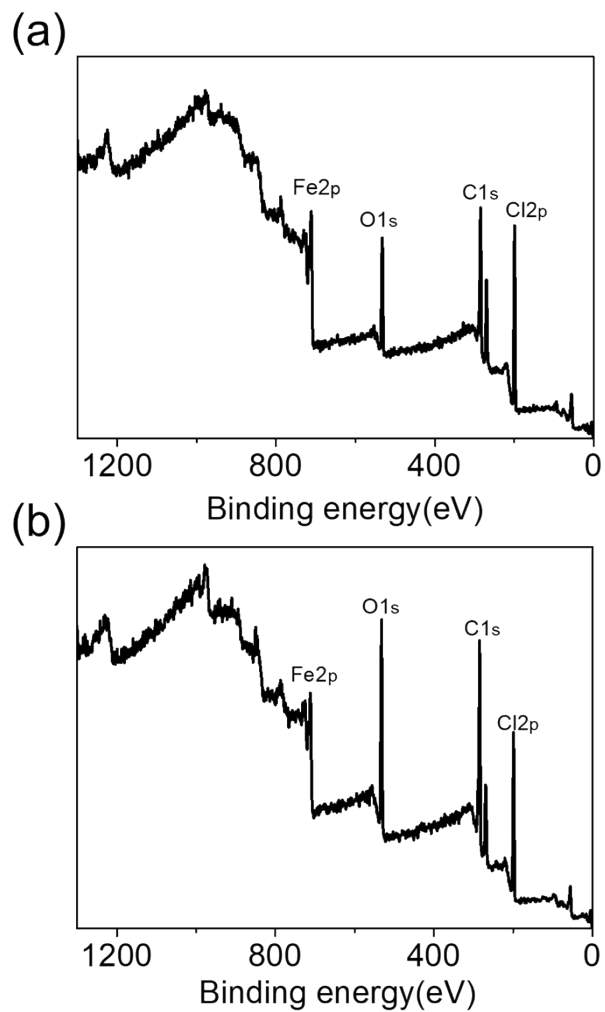

**Figure S2.** XPS spectra of PCF-1 and PCF-2

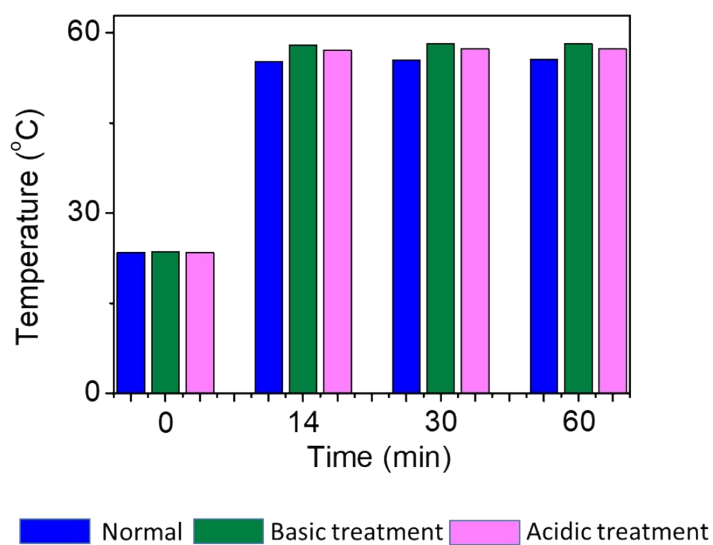

**Figure S3.** Temperature change of PCF-1 upon light irradiation for different time

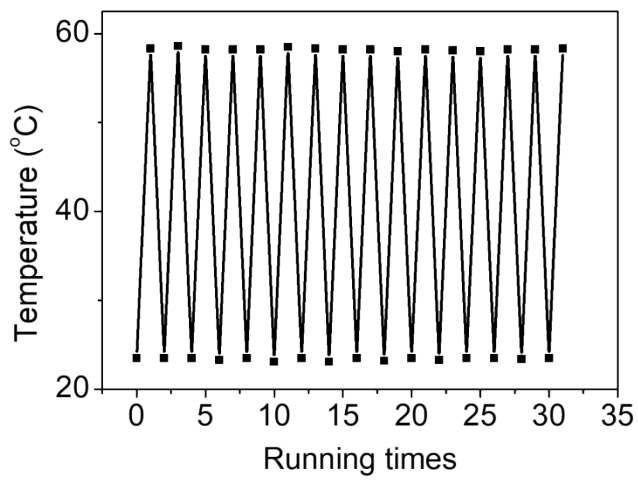

**Figure S4.** Cycling temperature of PCF-1 under one sun irradiation

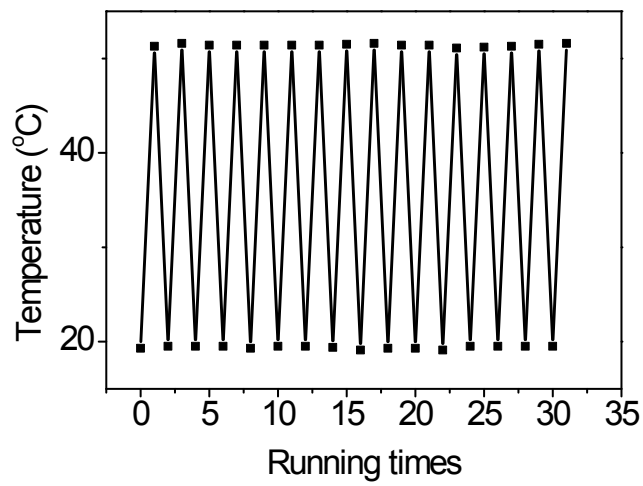

**Figure S5.** Cycling temperature of PCF-2 under one sun irradiation

**Figure S6.** Images of W-SSGD made from PCF-1 and wood

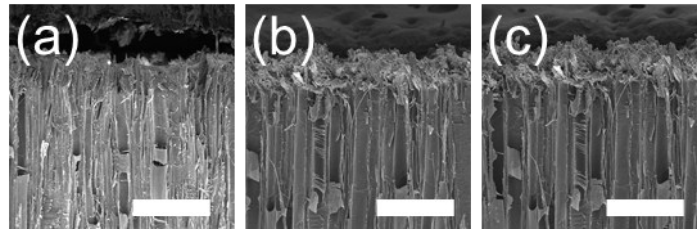

**Figure S7.** SEM images of W-SSGD a) normal condition, cross-sectional view, scale bar = 400  $\mu\text{m}$ ; b) after basic treatment, cross-sectional view, scale bar = 400  $\mu\text{m}$ ; c) after acidic treatment, cross-sectional view, scale bar = 400  $\mu\text{m}$

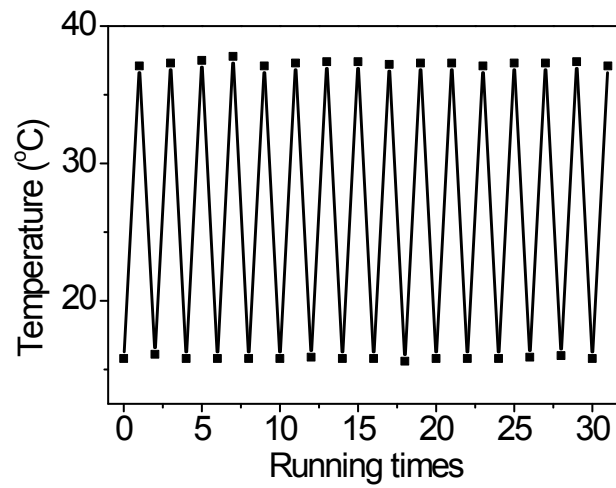

**Figure S8.** Cycling temperature of the W-SSGD under one sun irradiation

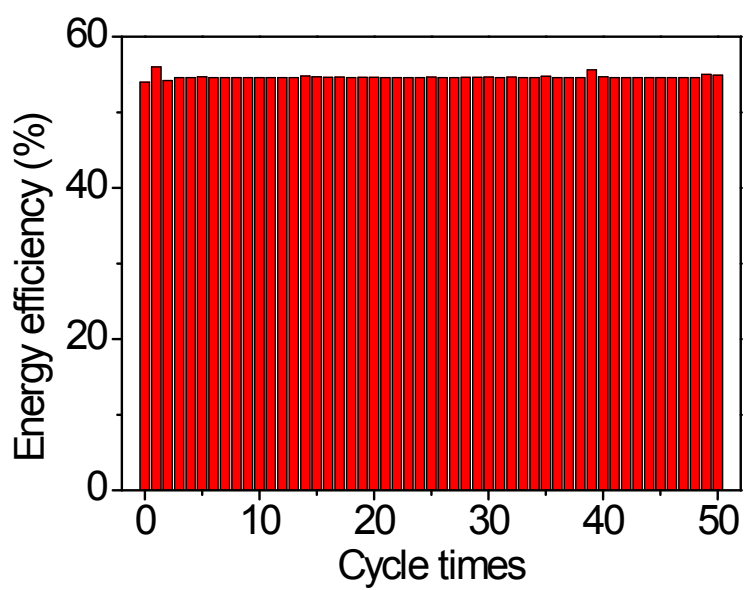

**Figure S9.** Cycling performance of the W-SSGD under one sun irradiation

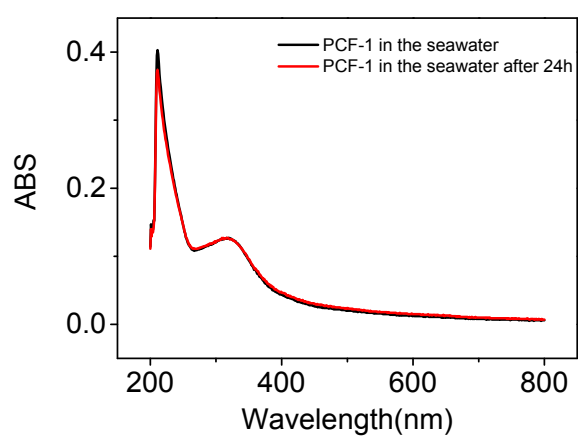

**Figure S10.** UV-Vis spectra of PCF-1 in seawater
